# Supplementary material for: Growth Trajectories during the First 6 Years in Survivors Born at Less Than 25 Weeks of Gestation Compared with Those between 25 and 29 Weeks
Source: MDPI journal article supplement (doi:10.3390/jcm11051418), 2022-03-04
Supplement: s1 [file s1]

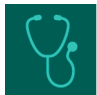

**Table S1.** Anthropometric indices at birth and 6 years of the children with and without follow-up.

|                |                           | With Follow-Up |               | Without Follow-Up |               | <i>p</i><br>(Male) | <i>p</i><br>(Female) |
|----------------|---------------------------|----------------|---------------|-------------------|---------------|--------------------|----------------------|
|                |                           | Male           | Female        | Male              | Female        |                    |                      |
| 22–24<br>weeks | n                         | 16             | 28            | 13                | 13            |                    |                      |
|                | Gestational age (weeks)   | 24.2 ± 0.6     | 24.0 ± 0.6    | 24.1 ± 0.8        | 23.8 ± 0.7    | 0.99               | 0.55                 |
|                | Weight (g)                | 635.4 ± 127.3  | 605.2 ± 93.0  | 659.5 ± 103.7     | 570.4 ± 102.3 | 0.50               | 0.18                 |
|                | Weight z-scores           | −0.4 ± 1.2     | −0.0 ± 0.8    | 0.0 ± 1.2         | −0.2 ± 1.2    | 0.35               | 0.47                 |
|                | Length (cm)               | 29.7 ± 2.2     | 29.7 ± 1.7    | 30.4 ± 1.8        | 29.2 ± 1.8    | 0.32               | 0.31                 |
|                | Length z-scores           | −0.3 ± 0.9     | −0.2 ± 0.7    | 0.1 ± 0.9         | −0.3 ± 0.9    | 0.18               | 0.65                 |
|                | HC (cm)                   | 21.6 ± 1.0     | 21.0 ± 1.1    | 21.6 ± 1.5        | 21.0 ± 1.1    | 0.99               | 0.92                 |
|                | HC z-scores               | 0.1 ± 0.6      | −0.2 ± 0.7    | 0.1 ± 1.0         | −0.2 ± 0.8    | 0.73               | 0.76                 |
| 25–29<br>weeks | Small for gestational age | 1 (6.3)        | 1 (3.6)       | 1 (7.7)           | 1 (7.7)       | 0.92               | 0.61                 |
|                | n                         | 84             | 59            | 101               | 88            |                    |                      |
|                | Gestational age (weeks)   | 27.6 ± 1.5     | 27.7 ± 1.5    | 27.7 ± 1.5        | 27.9 ± 1.5    | 0.53               | 0.47                 |
|                | Weight (g)                | 936.6 ± 250.7  | 878.3 ± 268.4 | 1006.4 ± 228.3    | 990.4 ± 235.5 | 0.06               | 0.01                 |
|                | Weight z-scores           | −1.0 ± 1.2     | −1.2 ± 1.3    | −0.6 ± 1.2        | −0.5 ± 1.1    | 0.01               | <0.01                |
|                | Length (cm)               | 34.6 ± 3.0     | 34.0 ± 3.7    | 35.3 ± 2.7        | 35.3 ± 3.0    | 0.16               | 0.05                 |
|                | Length z-scores           | −0.4 ± 1.1     | −0.8 ± 1.2    | −0.2 ± 1.2        | −0.3 ± 1.1    | 0.16               | 0.01                 |
|                | HC (cm)                   | 24.9 ± 2.2     | 24.1 ± 2.3    | 25.1 ± 1.9        | 25.0 ± 1.9    | 0.30               | 0.03                 |
|                | HC z-scores               | −0.0 ± 0.9     | −0.5 ± 0.9    | 0.1 ± 0.9         | −0.2 ± 0.8    | 0.36               | <0.01                |
|                | Small for gestational age | 17 (20.2)      | 18 (30.5)     | 15 (14.9)         | 9 (10.2)      | 0.33               | <0.01                |

Data are presented as the number (percentage) of subjects. \*  $p < 0.05$ , \*\*  $p < 0.01$ , compared with the 22–24 weeks group.
